# Supplementary material for: Underestimated Amoebic Appendicitis among HIV-1-Infected Individuals in Japan
Source: PubMed Central journal article supplement (PMC5228245; doi:10.1128/jcm.01757-16), 2016-12-28
Supplement: JCM.01757-16_zjm999095327s1.pdf [file JCM.01757-16_zjm999095327s1.pdf]

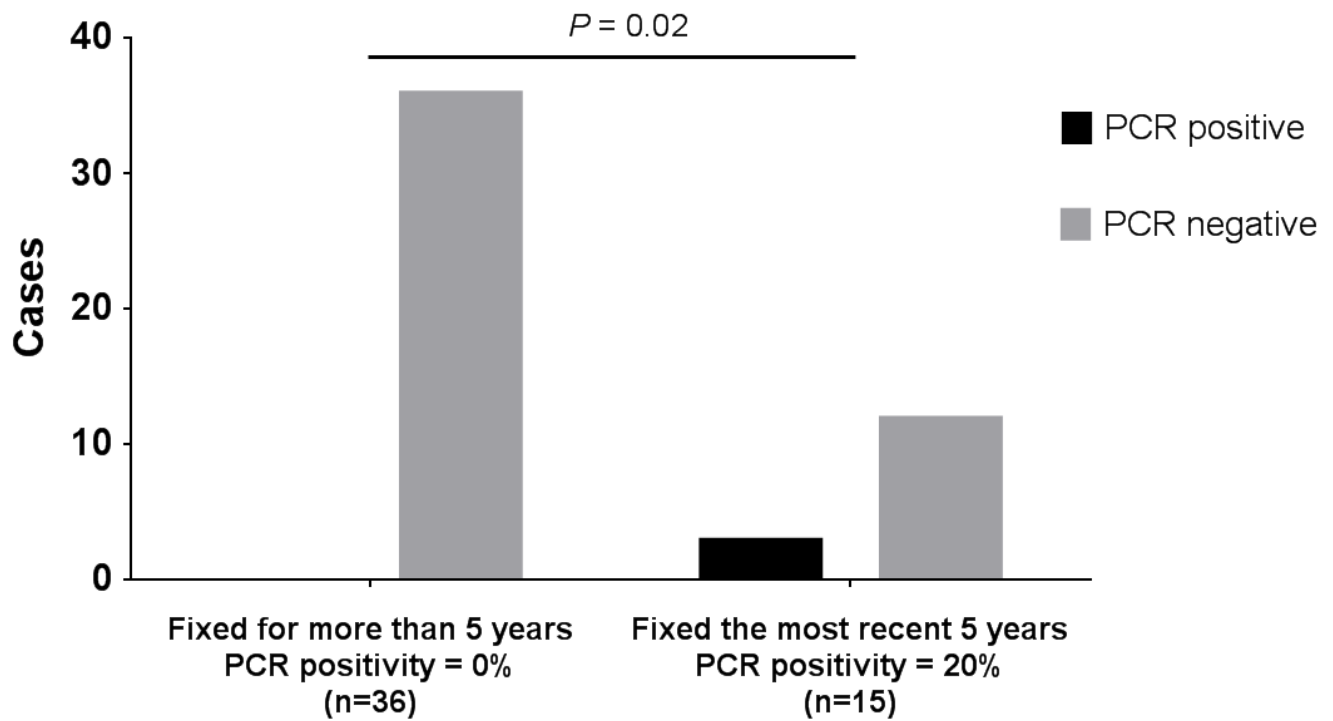

**Supplementary Figure 1. Results of polymerase chain reaction (PCR) using histologically-negative samples (n=51).** The PCR-positivity rate of tissue samples fixed for more than 5 years was significantly lower than the rate of samples fixed in the most recent 5 years (Fisher's exact test,  $P=0.02$ ).
